# Supplementary material
Source: MDPI journal article supplement (https://www.mdpi.com/2073-4433/10/7/400)
Supplement: s1 [file s1]

## Supplementary Materials

Kitchen area air quality measurements in northern Ghana: evaluating the performance of a low-cost particulate sensor within a household energy study

### Authors

Evan R. Coffey<sup>1\*</sup>

David Pfothenhauer<sup>1</sup>

Anondo Mukherjee<sup>2</sup>

Desmond Agao<sup>3</sup>

Ali Moro<sup>3</sup>

Maxwell Dalaba<sup>3</sup>

Taylor Begay<sup>1</sup>

Natalie Banacos<sup>4</sup>

Abraham Oduro<sup>3</sup>

Katherine L. Dickinson<sup>4</sup>

Michael Hannigan<sup>1</sup>

### Affiliations

\*corresponding author

<sup>1</sup>University of Colorado Boulder College of Engineering and Applied Science. 427 UCB, 1111 Engineering Drive, Boulder, CO 80309 USA

<sup>2</sup>University of Colorado Boulder Atmospheric and Oceanic Sciences. 311 UCB, Boulder, CO 80309 USA

<sup>3</sup>Navrongo Health Research Centre, Behind Navrongo War Memorial Hospital, Upper East Region, Ghana, West Africa.

<sup>4</sup>Colorado School of Public Health, University of Colorado Anschutz Medical Campus. 13001 East 17th Place, Aurora, CO, 80045.

# Baseline Correction algorithm

%% P3 Ghana Cookstove Project HAPEx Analysis

%Created by Anondo Murkerjee in Python and translated to Matlab by Taylor Begay

```
tic
% Clear workspace, command window, and close any open figures.
clear all;close all;

%% Begin Body of Code
disp('-----')
disp('-----HAPEx Analysis Code-----')
disp('-----')

%% User selects the folder with data for analysis
% Ask the user for folder path and get the directory info
disp('Select folder with dataset for analysis');
disp(' ');

% Prompt the user to select the folder with HAPEx data folders
hapexDir = uigetdir(pwd,'Select folder with dataset for analysis');

% Display an error if user hits "cancel"
assert(~isequal(hapexDir,0),'No data folder selected!');
disp(['Analyzing files in folder: ' hapexDir '...'])
disp(' ')

%% User selects the subfolders within the selected HAPEx data folder
% Ask user to pick 1 or more files with HAPEx data that NEEDS to be
% baseline corrected
disp('Select 1 or more folders for HAPEx baseline correction')
IndivHAPExdir = uigetfile_n_dir(hapexDir,'Choose 1 or more folders');

% Get the number of selected subfolders that are to be checked for DST
% errors.
nFolders = size(IndivHAPExdir,2);

%% User selects the folder for outputs to be saved
% Ask the user for output folder path
outFolderPath = uigetdir(pwd,'Select folder for outputs to be saved');

% Display an error if user hits "cancel"
assert(~isequal(outFolderPath,0),'No output folder selected!');

%% Create a folder within the output folder to store all the files from each run
finalFolder = ['Baseline Corrected ' 'Time-' datestr(now,'mm-dd-yy HHMMSS')];
mkdir(outFolderPath,finalFolder)
outPath = fullfile(outFolderPath,finalFolder); % Store that file path for use later

%% Create a pathway to the excel file that keeps track of skipped/bad HAPEx files
%Prompt the user to select the 'Skipped HAPEx files.csv' file
[SkippedFileName,SkippedFilesPath] = uigetfile(['*.csv; *.CSV'],'Select ''Skipped HAPEx files.csv'', 'MultiSelect','off');

% Create the pathway to the excel file
SkippedFilesdir = fullfile(SkippedFilesPath,SkippedFileName);

% Initialize a Count variable to keep track of baseline corrected files as
% well as a current date variable
Count = 0;
currentDate = datetime(datestr(now,'dd/mm/yyyy HH:MM:ss'));

% Gather the directories to all the HAPEx files in all the selected
% subfolders.
allHAPExfiles = [];
for n = 1:nFolders
% for n = 1

    % Create the folder name
    try
        indCatch = regexp(IndivHAPExdir{n},'\d+\.\d+\.\d+');
        folderName = IndivHAPExdir{n}(indCatch(1):end);
    catch
        indCatch = regexp(IndivHAPExdir{n},'\');
        folderName = IndivHAPExdir{n}(indCatch(end)+1:end);
    end

    % Get the filepaths to all the .csv files within the selected folder.S
    [~,message,~] = fileattrib([IndivHAPExdir{n},'\*']);
    allExts = cellfun(@(s) s(end-2:end),(message.Name),'uni',0); % Get the extensions to every file and subfolder in the selected folder
    CSVidx = ismember(allExts,'csv'); % Search 'allExts' for files that have .csv extensions
    allHAPExfiles = [message(CSVidx).Name]; % Use CSVidx to list all file paths to the .csv files

% Display total number of .csv files within the selected folder.
disp(' ')
fprintf('Analyzing %i *.csv HAPEx files in folder: %s\n',numel(allHAPExfiles),folderName)

% Convert the list of hapex files to a table if it's not empty
if isempty(allHAPExfiles)
    allHAPExfiles = table([],[],[],[],[],[],{'VariableNames',{'name','folder','date','bytes','isdir','datenum'}});
else
    allHAPExfiles = cell2table(allHAPExfiles,'VariableNames',{'folder'});
end

%% %% Read columns of data as strings
% formatSpec = '%s%s';
% delimiter = ',';

%% Loop through all files in selected folders and correct the baseline for each set of data
% for i = 1:size(allHAPExfiles,1)
% for i = 27:size(allHAPExfiles,1)
```

```

% Create the file name and file path
filePath = char(allHAPEXfiles.folder(i));
filename = filePath(regexp(filePath,'HAPEX_\d+'):end-4);

fprintf('%-10i %-10i Baseline correcting data in file: %s',i,numel(allHAPEXfiles),filename)

% Call to the function importHAPEXfiles to extract the data in each
% file
[TimeStamp,HAPEX,compliance] = importHAPEXfiles(filePath);

% Check for date issues
if any(TimeStamp > currentDate)
    disp([' --- File: ' filename ' has datetime issues'])
    output = cell2table(cellstr(filename));
    output.Properties.VariableNames = {'Skipped_files'};
    Table = readtable(SkippedFilesdir,'Delimiter','');
    % If there's no previous table data, write our output row at the first
    % row in this table.
    if isempty(Table)
        writetable(output,SkippedFilesdir,'Delimiter','')
        Skipped_files = length(output);
    % If there's already data in the table, append our new data row to the
    % end of the old table, then rewrite the table into the csv file.
    else
        Table_all = [Table; output]; % Append new list to old list
        Table_new = unique(Table_all); % In case duplicate files were selected from last run, take only unique filenames
        Skipped_files = size(Table_new,1) - size(Table,1);
        writetable(Table_new,SkippedFilesdir,'Delimiter','')
    end

    clear output Table Table_all Table_new
    continue
end

% Skip the file if no time data exists. Should be an empty HAPEX file.
if isempty(TimeStamp)
    disp([' --- File: ' filename ' does not have a sufficient amount of data'])
    output = cell2table(cellstr(filename));
    output.Properties.VariableNames = {'Skipped_files'};
    Table = readtable(SkippedFilesdir,'Delimiter','');
    % If there's no previous table data, write our output row at the first
    % row in this table.
    if isempty(Table)
        writetable(output,SkippedFilesdir,'Delimiter','')
        Skipped_files = length(output);
    % If there's already data in the table, append our new data row to the
    % end of the old table, then rewrite the table into the csv file.
    else
        Table_all = [Table; output]; % Append new list to old list
        Table_new = unique(Table_all); % In case duplicate files were selected from last run, take only unique filenames
        Skipped_files = size(Table_new,1) - size(Table,1);
        writetable(Table_new,SkippedFilesdir,'Delimiter','')
    end

    clear output Table Table_all Table_new
    continue
end

% Merge the data into a table and convert to a timetable
dat2 = table(TimeStamp,HAPEX,compliance);
dat2timetable = table2timetable(dat2);

% Take the minute average of the data using mean
dat2min = retime(dat2timetable,'minutely','mean');

dat2shape = size(dat2min);
dat2cols = dat2shape(1);

% If there are only 5 data points, or less than 5 data points, skip the
% file.
if dat2shape(1) <= 6 % Less than or equal to 5 data points
    disp([' --- File: ' filename ' does not have a sufficient amount of data'])
    output = cell2table(cellstr(filename));
    output.Properties.VariableNames = {'Skipped_files'};
    Table = readtable(SkippedFilesdir,'Delimiter','');
    % If there's no previous table data, write our output row at the first
    % row in this table.
    if isempty(Table)
        writetable(output,SkippedFilesdir,'Delimiter','')
        Skipped_files = length(output);
    % If there's already data in the table, append our new data row to the
    % end of the old table, then rewrite the table into the csv file.
    else
        Table_all = [Table; output]; % Append new list to old list
        Table_new = unique(Table_all); % In case duplicate files were selected from last run, take only unique filenames
        Skipped_files = size(Table_new,1) - size(Table,1);
        writetable(Table_new,SkippedFilesdir,'Delimiter','')
    end

    clear output Table Table_all Table_new
    continue
end

% Get the column names of the data
colnames = dat2min.Properties.VariableNames;
hapexlname = colnames(1);
hapexl_com_name = colnames(2);

% Store the HAPEX and compliance data into the variable hapexl
hapexl = dat2min;

% Get the timetable and array format of hapexl
hapexltable = timetable2table(hapexl);
hapexlarray = table2array(hapexltable(:,[2,3]));

% Initialize the array for the baseline
mins = size(hapexl,1);
hapexl_base = zeros(mins,2);

```

```

% Iterate through each minute (ii), using 80 minute windows from minute
% (ii) to (ii + 80) to find baseline
for ii = 1:mins-1
    if ii < mins-81
        win40 = hapexl(ii:ii+80,:); % Find 80 minute running window
        win40table = timetable2table(win40);
        win40array = table2array(win40table(:,[2,3]));
    elseif ii >= mins-81
        win40 = hapexl(ii:mins-1,:); % Use the remaining data if less than 80 minutes exist after minute (ii)
        win40table = timetable2table(win40);
        win40array = table2array(win40table(:,[2,3]));
    end

    % Determine how many negative HAPEx values there are
    negwin = win40array(win40array(:,1) < 0);
    negcnt = length(negwin);

    % Replace negative HAPEx values with NaN, replacing compliance
    % values with NaN if it's corresponding hapex value is NaN.
    if negcnt < 5 && negcnt > 0
        win40array(win40array(:,1) < 0) = NaN;
        win40array(any(isnan(win40array),2),:) = NaN;
    end

    % Sort the values based on the hapex values only
    [~,idx] = sort(win40array(:,1));
    sortwin10 = win40array(idx,:);
    wincnt = length(win40array);

    if wincnt > 2
        hapexl_base(ii,:) = sortwin10(3,:);
    elseif wincnt <= 2
        win40min = nanmin(win40array);
        hapexl_base(ii,:) = win40min;
    end
    clear win40 win40table win40array
end

% Let the baseline go flat for the last 6 minutes (set last 5 values to
% 6th to last value)
last5valHap = hapexl_base(mins-6,1); last5valCom = hapexl_base(mins-6,2);
hapexl_base(mins-5,1) = last5valHap; hapexl_base(mins-5,2) = last5valCom;
hapexl_base(mins-4,1) = last5valHap; hapexl_base(mins-4,2) = last5valCom;
hapexl_base(mins-3,1) = last5valHap; hapexl_base(mins-3,2) = last5valCom;
hapexl_base(mins-2,1) = last5valHap; hapexl_base(mins-2,2) = last5valCom;
hapexl_base(mins-1,1) = last5valHap; hapexl_base(mins-1,2) = last5valCom;
hapexl_base(mins,1) = last5valHap; hapexl_base(mins,2) = last5valCom;

hapexl_B_Cor = hapexlarray - hapexl_base; % Subtract the baseline from the original
common_val = mode(hapexl_B_Cor(:,1));
Mode = repmat(common_val,mins,1);

% Most common value should be small (ideally near zero)
fprintf(' -- Most common value in corrected HAPEx: %3.1f\n',common_val)
hapexl_B_Cor(:,1) = hapexl_B_Cor(:,1) - common_val;

% Combine data for the final output csv file.
outTable = table(datestr(table2array(hapexltable(:,1))),hapexlarray(:,1),hapexlarray(:,2),...
    hapexl_base(:,1),Mode,hapexl_B_Cor(:,1),'VariableNames',{'datetime',...
    'HAPEx','compliance','HAPEx_Baseline','Mode','HAPEx_B_corrected'});

% Convert the table and create a csv file in the output folder
filenameout = ['B_Cor ' filename];
writetable(outTable,[char(fullfile(outPath,filenameout)) '.csv'])

% Plot the corrected data over the original
figure(i)
plot(table2array(hapexltable(:,1)),hapexlarray(:,1),'k')
hold on
plot(table2array(hapexltable(:,1)),hapexl_B_Cor(:,1),'b')
title([datestr(table2array(hapexltable(1,1))) ' ~ ' datestr(table2array(hapexltable(end,1)))])
xlabel('Date')
ylabel('Pollutant Concentration')

% Adjust the x-axis to show the proper date
xlim([table2array(hapexltable(1,1)) table2array(hapexltable(end,1))])
xtickformat('MM/dd HH:mm')
NumTicks = 4;
L = get(gca,'XLim');
set(gca,'XTick',linspace(L(1),L(2),NumTicks))

% Adjust the legend to show the mode of the data
Spacing_lines = 2;
h = plot(nan(mins,Spacing_lines));
hold off
set(h,{'Color'},{'w'});
hl = legend([{'Original','Corrected'} repmat({''},1,Spacing_lines)],'Box','Off');
annotation('textbox',hl.Position,'String',{'Mode = ' sprintf('%1.0f',common_val)}],...
    'VerticalAlignment','Bottom','Edgecolor','none','FontSize',12);
set(gca,'FontSize',12,'LineWidth',1.5)
set(legend,'FontSize',12)

% Save the image in the same folder as the created csv file
imageFileOut = ['Image_ ' strrep(filename,'.csv','.jpeg')];
saveas(figure(i),char(fullfile(outPath,imageFileOut)))
close(gcf)

Count = Count + 1;
end
end

fprintf('Total files: %i\n',size(allHAPExfiles,1))
fprintf('Analyzed files: %i\n',Count)
toc

```

## Relative humidity corrections

Two pointwise RH corrections were tested on 1-min baseline-corrected HAPEx data. Equation S1 is from Chakrabarti et al., 2004 [1] using RH as a decimal fraction. Equation S2 was derived from sensitivity effects found by Wang et al., 2015 [2] (Figure S1) with data they provided with RH as a percentage.

$$HAPEx_{corr} = \frac{HAPEx_{raw}}{1 + \frac{0.25 \times RH^2}{1 - RH}} \quad \text{Equation S1}$$

$$HAPEx_{corr} = HAPEx_{raw} \times 1.18E^{-8} \times RH\%^{4.167} + 0.859 \quad \text{Equation S2}$$

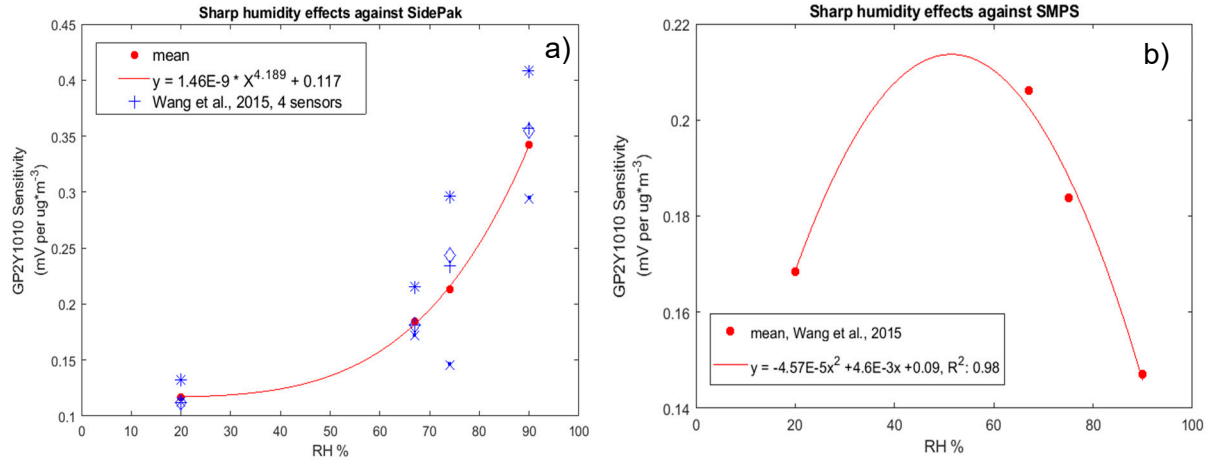

Figure S1: Relative humidity effects on a) GP2Y1010 sensors (n=4) as measured by Wang et al., 2015 using a TSI SidePak Personal Aerosol Monitor AM510 as reference. A power function best fit the data and correction coefficients were determined relative to a RH of 50% and b) GP2Y1010 sensors as measured by Wang et al., 2015 using a scanning mobility particle sizer (SMPS) as reference. A quadratic function best fit the data. This correction was not pursued due to humidity effects on the reference instrument noted by the authors.

$$48hr \text{ HAPEx}_{weighted} \text{ mean measure} = \frac{\sum \text{measure}_i \times \frac{HAPEx_i}{\sum_{i=1}^n HAPEx_n}}{\sum \frac{HAPEx_i}{\sum_{i=1}^n HAPEx_n}} \quad \text{Equation S3}$$

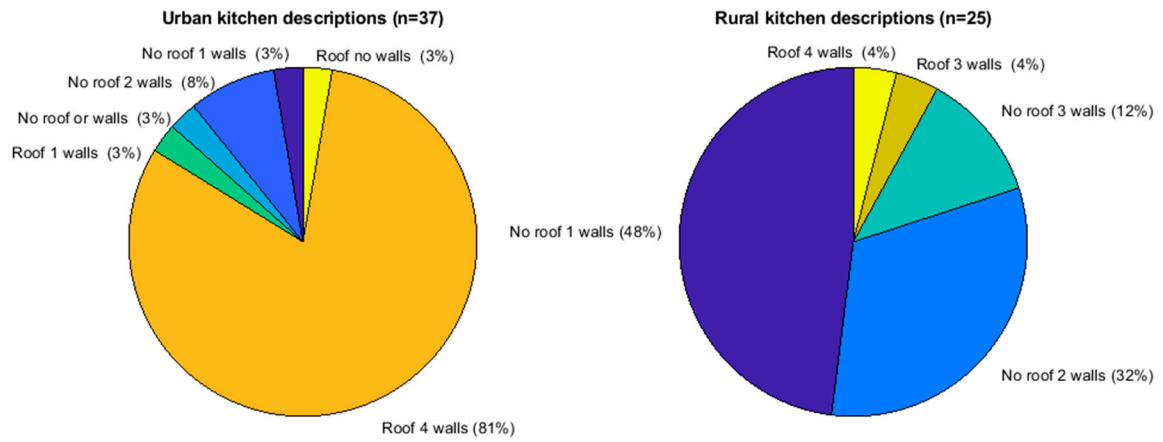

Figure S2: Classification of urban and rural kitchen descriptions from 60 study households visited. Urban kitchens tend to have more walls and oftentimes a roof, relative to rural kitchens.

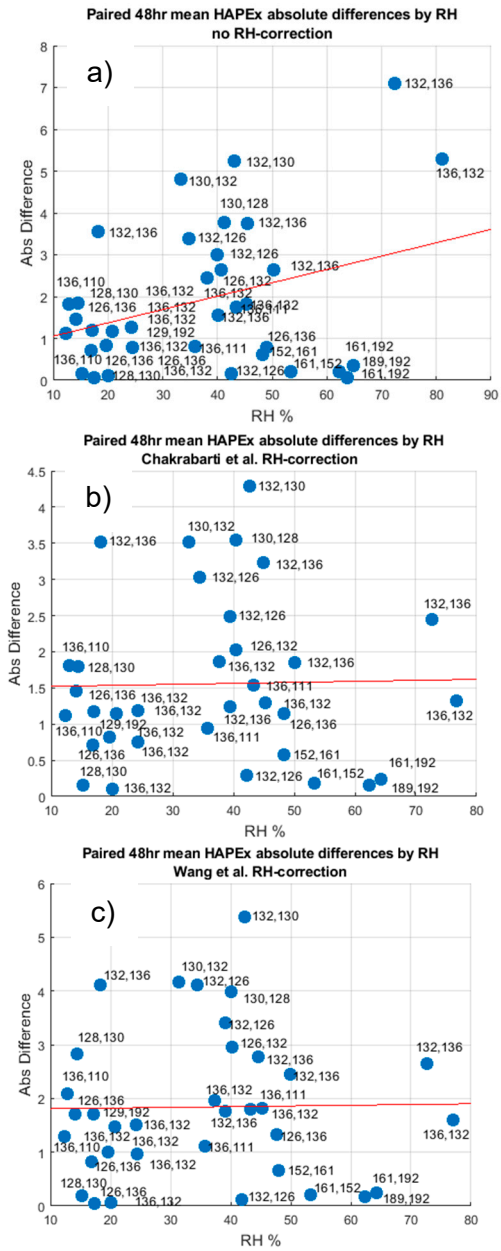

Figure S3: Absolute differences between paired 48hr mean HAPEx readings using a) no RH-correction b) the Chakrabarti et al. and c) Wang et al. pointwise RH corrections. Red lines show linear trend. HAPEx unit IDs are shown.

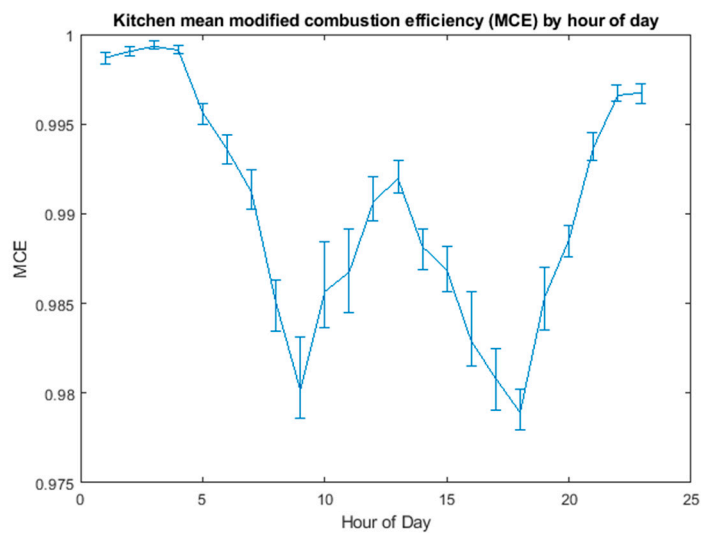

Figure S4: Mean (95% CI using bootstrapping) modified combustion efficiency (MCE) as measured by deployment-specific background-subtracted CO and CO<sub>2</sub> concentrations for all samples. Lower MCE (<1) is indicative of combustion activity with depressions corresponding to typical mealtimes 7:00-9:00 and 16:00-19:00.



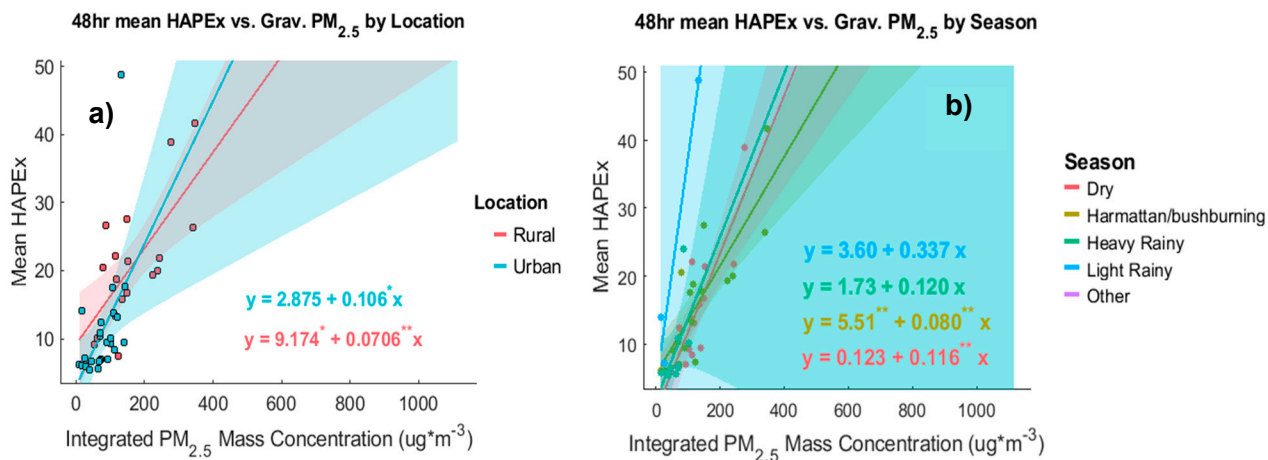

Figure S5: Kitchen area 48hr mean HAPEx readings against gravimetric total PM<sub>2.5</sub> mass concentration grouped by a) rural and urban kitchens and b) season. Shaded areas represent 95% CI of linear model (\*p<0.05, \*\*p<0.01). Grouping the regression analysis of mean 48hr HAPEx signal on gravimetric PM<sub>2.5</sub> mass concentrations by urban and rural location and by season, slopes and intercepts change slightly to reflect location-specific particle properties and environments. Rural samples have a slightly shallower slope (0.0706, 95% CI: 0.032, 0.109, p<0.05) than urban samples (0.106, 95% CI: 0.028, 0.185, p<0.05) yet have a larger intercept (9.17, p<0.05) compared to urban kitchens (2.88, p=0.37).

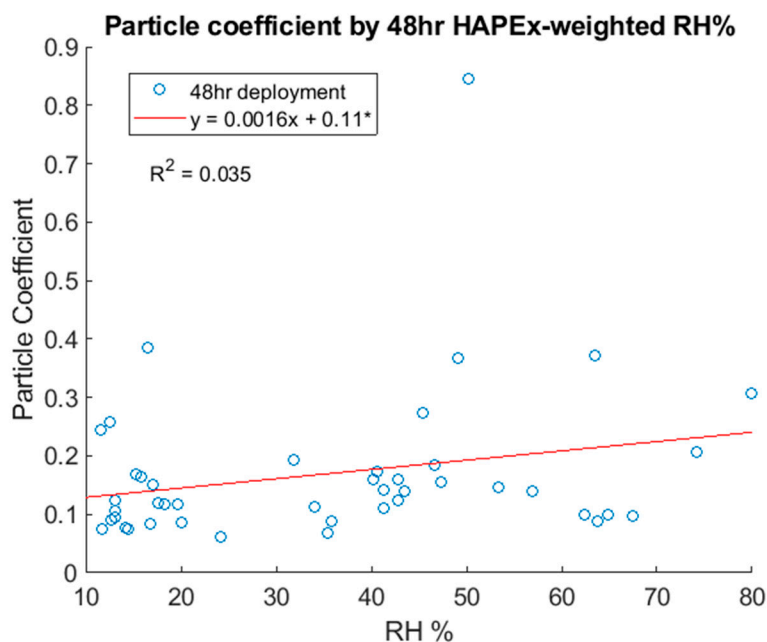

Figure S6: Scatterplot of particle coefficients by 48hr HAPEx-weighted mean RH. The slope of the linear best fit was not significantly different from zero ( $p=0.11$ ) yet the intercept was significant ( $*p<0.01$ ). These data were not pointwise RH-corrected. RH variation within 48hr periods were high and were likely washed-out when averaged over a 48hr period.

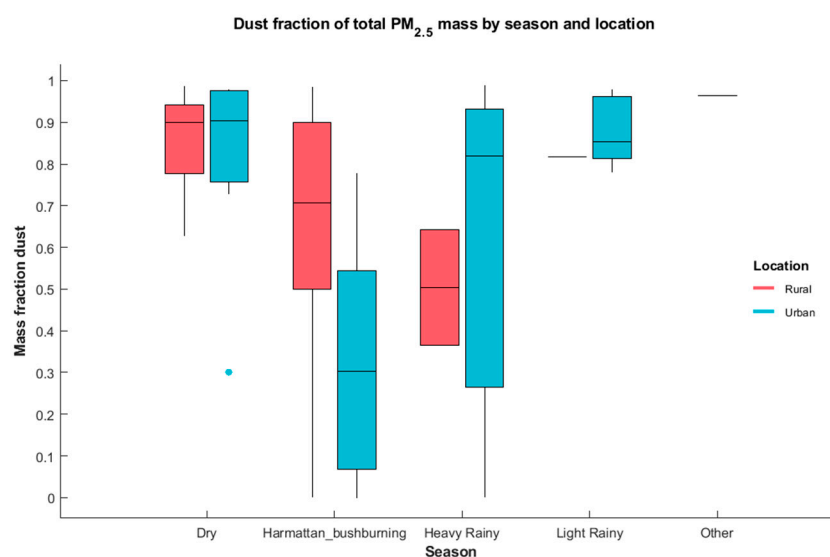

Figure S7: Boxplots of fraction of total PM<sub>2.5</sub> mass as dust by season and urban/rural classification. 'Dry' and 'Light Rainy' seasons have the highest median fractions of dust with more variation and lower fractions during the 'Harmattan/bushburning' and 'Heavy Rainy' seasons where urban/rural differences are most pronounced. 'Other' is a transitional period of two weeks between 'Light Rainy' and the 'Dry' seasons.

## Modeling Particle Coefficient

Linear regression model from Equation 6:

$$\text{ParticleCoefficient} \sim b(0) + b(1)\text{meanHAPEx}*\text{season} + b(2)\text{dust}*\text{season} + b(3)\text{meanHAPEx} *\text{LocationType}$$

Estimated Coefficients:

|                                        | Estimate    | SE         | tStat      | pValue     |            |         |
|----------------------------------------|-------------|------------|------------|------------|------------|---------|
| (Intercept)                            | 0.11176     | 0.037508   | 2.9796     | 0.0055697  |            |         |
| MeanHAPEx                              | 0.0065635   | 0.0037714  | 1.7403     | 0.091722   |            |         |
| Dust                                   | -0.00088273 | 0.00052119 | -1.6937    | 0.10035    |            |         |
| LocationType_Urban                     | 0.11983     | 0.051021   | 2.3487     | 0.02539    |            |         |
| MeanHAPEx:season_Harmattan_bushburning |             |            | -0.0010364 | 0.0040523  | -0.25577   | 0.79982 |
| MeanHAPEx:season_Heavy Rainy           |             | 0.0046899  | 0.0047347  | 0.99055    | 0.32958    |         |
| MeanHAPEx:season_Light Rainy           |             | 0.070954   | 0.0080961  | 8.764      | 6.7797e-10 |         |
| MeanHAPEx:season_Other                 |             | 0          | 0          | NaN        | NaN        |         |
| Dust:season_Harmattan_bushburning      | 0.00022017  | 0.00058909 | 0.37375    | 0.71113    |            |         |
| Dust:season_Heavy Rainy                | -0.0011368  | 0.00081863 | -1.3886    | 0.17485    |            |         |
| Dust:season_Light Rainy                | -0.023257   | 0.0028688  | -8.1067    | 3.7266e-09 |            |         |
| Dust:season_Other                      | 0           | 0          | NaN        | NaN        |            |         |
| MeanHAPEx:LocationType_Urban           |             | -0.010222  | 0.0039448  | -2.5913    | 0.014448   |         |

Number of observations: 44, Error degrees of freedom: 33

Reference groups:

MeanHAPEx:season – meanHAPEx:Dry

LocationType - Rural

Dust:season – Dust:Dry

MeanHAPEx:LocationType – MeanHAPEx:Urban

Root Mean Squared Error: 0.0609

R-squared: 0.837, Adjusted R-Squared 0.787

F-statistic vs. constant model: 16.9, p-value = 2.84e-10

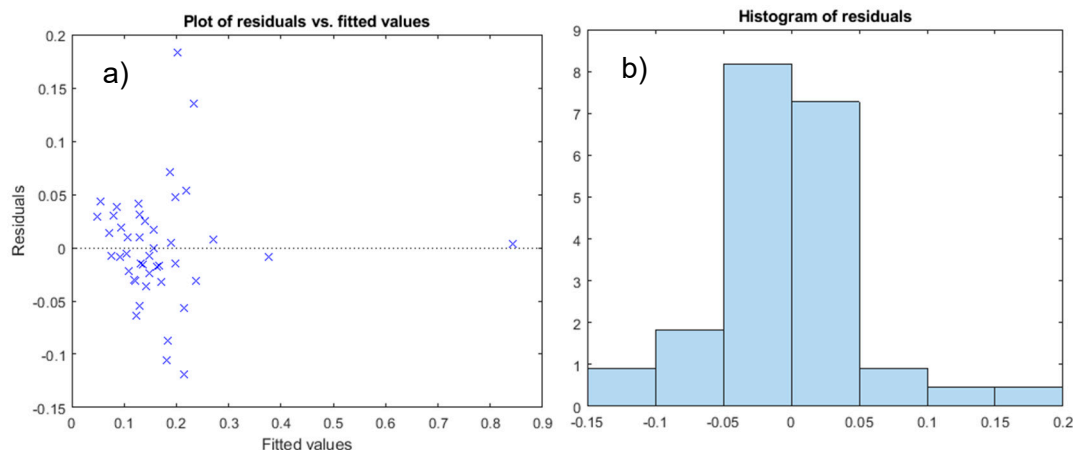

Figure S8: Modeling particle coefficient using equation 6 a) residuals by fitted values and b) histogram of residuals demonstrating normality.

## Modeling 48hr Gravimetric PM<sub>2.5</sub> Mass Concentration

Linear regression model (Equation 7) with no RH correction:

$\log([PM_{2.5}]) \sim b(0) + b(1)Mean\_temp + b(2)Mean\_rh + b(3)PercbyMCE + b(4)meanHAPEX + b(5)season + CoverageClass*LocationType'$  (Equation 7)

Estimated Coefficients:

|                                | Estimate  | SE        | tStat    | pValue     |
|--------------------------------|-----------|-----------|----------|------------|
| (Intercept)                    | 36.561    | 11.733    | 3.116    | 0.0066536  |
| Mean_temp                      | -0.10007  | 0.037208  | -2.6895  | 0.016114   |
| Mean_rh                        | -0.041546 | 0.011735  | -3.5404  | 0.0027213  |
| PercbyMCE                      | -0.36505  | 0.29336   | -1.2444  | 0.23127    |
| MeanHAPEX                      | 0.046299  | 0.0089789 | 5.1565   | 9.5586e-05 |
| CoverageClass_No roof 2 walls  | -0.20722  | 0.29603   | -0.69997 | 0.494      |
| CoverageClass_No roof 3 walls  | -0.34178  | 0.30454   | -1.1223  | 0.2783     |
| CoverageClass_No roof or walls | -0.34027  | 0.65891   | -0.51642 | 0.61262    |
| CoverageClass_Roof 1 walls     | -0.4727   | 0.65707   | -0.7194  | 0.48227    |
| CoverageClass_Roof 3 walls     | 0.28139   | 0.47671   | 0.59027  | 0.56326    |
| CoverageClass_Roof 4 walls     | 0.69222   | 0.4921    | 1.4067   | 0.17866    |
| CoverageClass_Roof no walls    | -1.941    | 0.7464    | -2.6005  | 0.019322   |
| season_Harmattan_bushburning   | -0.59267  | 0.21883   | -2.7083  | 0.015505   |
| season_Heavy Rainy             | 1.3492    | 0.56858   | 2.3729   | 0.030517   |

|                                                   |         |         |         |         |           |
|---------------------------------------------------|---------|---------|---------|---------|-----------|
| season_Light Rainy                                | 0.1014  | 0.5285  | 0.19187 | 0.85026 |           |
| season_Other                                      | 0       | 0       | NaN     | NaN     |           |
| LocationType_Urban                                | 0.87859 | 0.53205 | 1.6513  | 0.11816 |           |
| CoverageClass_No roof 2 walls:LocationType_Urban  |         |         | 0       | 0       | NaN       |
| CoverageClass_No roof 3 walls:LocationType_Urban  |         |         | 0       | 0       | NaN       |
| CoverageClass_No roof or walls:LocationType_Urban |         |         | 0       | 0       | NaN       |
| CoverageClass_Roof 1 walls:LocationType_Urban     |         |         | 0       | 0       | NaN       |
| CoverageClass_Roof 3 walls:LocationType_Urban     |         |         | 0       | 0       | NaN       |
| CoverageClass_Roof 4 walls:LocationType_Urban     |         | -2.5149 | 0.82064 | -3.0646 | 0.0074098 |
| CoverageClass_Roof no walls:LocationType_Urban    |         | 0       | 0       | NaN     | NaN       |

Number of observations: 40, Error degrees of freedom: 23

Reference groups:

CoverageClass - No roof and 1 wall

season - Dry

LocationType - Rural

Mean\_CO2:season - Mean\_CO2:Dry

CoverageClass:LocationType - no roof and 1 wall:Rural

Root Mean Squared Error: 0.418

R-squared: 0.816, Adjusted R-Squared 0.687

F-statistic vs. constant model: 6.36, p-value = 3.95e-05

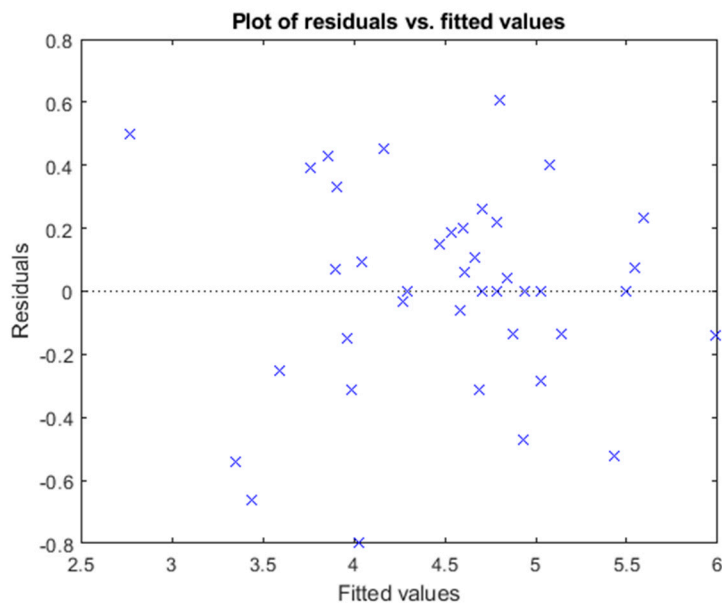

Figure S9: Residuals of Equation 7 by fitted values. RMSE=0.42.

Linear regression model (Equation 8) with pointwise RH correction:

$$\log([PM_{2.5}]) \sim b(0) + b(1)Mean\_temp + b(2)Mean\_rh + b(3)PercbyMCE + b(4)meanHAPEX + b(5)cleanSD + b(6)Mean\_CO2*season + b(7)CoverageClass*LocationType' \text{ (Equation 8)}$$

Estimated Coefficients:

|                                                   | Estimate   | SE        | tStat     | pValue     |           |           |
|---------------------------------------------------|------------|-----------|-----------|------------|-----------|-----------|
| (Intercept)                                       | 41.366     | 11.69     | 3.5387    | 0.0053682  |           |           |
| Mean_temp                                         | -0.099825  | 0.039135  | -2.5508   | 0.028826   |           |           |
| Mean_rh                                           | -0.032006  | 0.010831  | -2.9551   | 0.014409   |           |           |
| Mean_CO2                                          | -0.0096285 | 0.0043357 | -2.2207   | 0.050631   |           |           |
| PercbyMCE                                         | -0.80014   | 0.30895   | -2.5898   | 0.026958   |           |           |
| MeanHAPEX <sub>RH-corr</sub>                      | 0.076047   | 0.011466  | 6.6322    | 5.8379e-05 |           |           |
| CoverageClass_No roof 2 walls                     |            | -0.34652  | 0.31048   | -1.1161    | 0.29049   |           |
| CoverageClass_No roof 3 walls                     |            | -0.058938 | 0.29328   | -0.20096   | 0.84476   |           |
| CoverageClass_No roof or walls                    |            | 2.497     | 0.67948   | 3.6748     | 0.0042831 |           |
| CoverageClass_Roof 1 walls                        |            | 2.4972    | 0.6919    | 3.6092     | 0.0047744 |           |
| CoverageClass_Roof 3 walls                        |            | -0.053256 | 0.41547   | -0.12818   | 0.90055   |           |
| CoverageClass_Roof 4 walls                        |            | 1.2784    | 0.49616   | 2.5765     | 0.027581  |           |
| CoverageClass_Roof no walls                       |            | 2.0579    | 0.84339   | 2.44       | 0.034846  |           |
| season_Harmattan_bushburning                      |            | -4.1741   | 1.9297    | -2.1631    | 0.055818  |           |
| season_Heavy Rainy                                |            | -1.542    | 2.0825    | -0.74047   | 0.47604   |           |
| season_Light Rainy                                | 30.205     | 11.919    | 2.5343    | 0.029653   |           |           |
| season_Other                                      | 0          | 0         | NaN       | NaN        |           |           |
| LocationType_Urban                                |            | -2.4353   | 0.5909    | -4.1213    | 0.0020727 |           |
| CleanSD                                           |            | -0.084713 | 0.032449  | -2.6107    | 0.02601   |           |
| Mean_CO2:season_Harmattan_bushburning             |            |           | 0.0074781 | 0.0040819  | 1.832     | 0.096856  |
| Mean_CO2:season_Heavy Rainy                       |            |           | 0.0059761 | 0.0041165  | 1.4517    | 0.17721   |
| Mean_CO2:season_Light Rainy                       |            |           | -0.069704 | 0.027166   | -2.5658   | 0.028091  |
| Mean_CO2:season_Other                             |            |           | 0         | 0          | NaN       | NaN       |
| CoverageClass_No roof 2 walls:LocationType_Urban  |            |           | 3.3572    | 0.79594    | 4.2179    | 0.0017776 |
| CoverageClass_No roof 3 walls:LocationType_Urban  |            |           | 0         | 0          | NaN       | NaN       |
| CoverageClass_No roof or walls:LocationType_Urban |            |           | 0         | 0          | NaN       | NaN       |
| CoverageClass_Roof 1 walls:LocationType_Urban     |            |           | 0         | 0          | NaN       | NaN       |
| CoverageClass_Roof 3 walls:LocationType_Urban     |            |           | 0         | 0          | NaN       | NaN       |

|                                                |   |   |     |     |
|------------------------------------------------|---|---|-----|-----|
| CoverageClass_Roof 4 walls:LocationType_Urban  | 0 | 0 | NaN | NaN |
| CoverageClass_Roof no walls:LocationType_Urban | 0 | 0 | NaN | NaN |

Number of observations: 40, Error degrees of freedom: 18

Reference groups:

- CoverageClass - No roof and 1 wall
- season – Dry
- LocationType - Rural
- Mean\_CO2:season – Mean\_CO2:Dry
- CoverageClass:LocationType - no roof and 1 wall:Rural

Root Mean Squared Error: 0.346

R-squared: 0.901, Adjusted R-Squared 0.786

F-statistic vs. constant model: 7.83, p-value = 2.48e-05

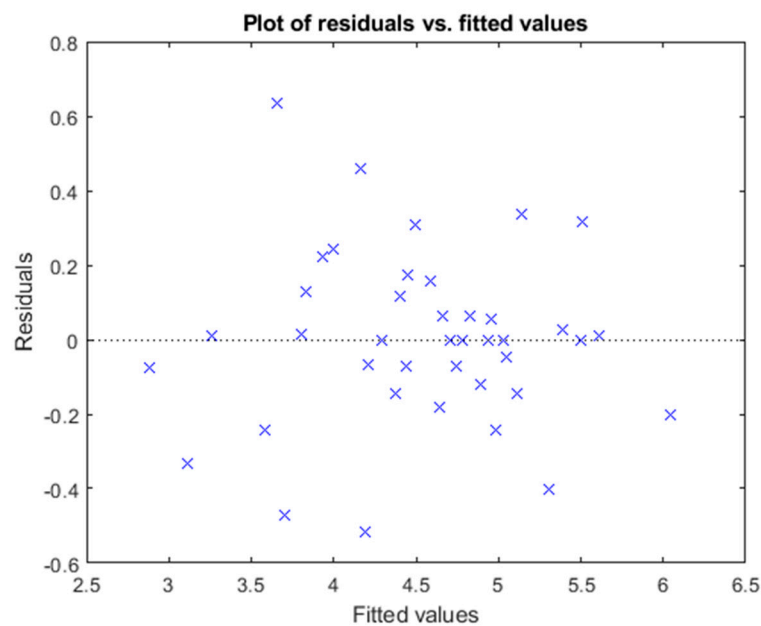

Figure S10: Residuals of Equation 8 by fitted values. RMSE=0.35.

References:

[1] Chakrabarti, B.; Fine, P.M.; Delfino, R.; Sioutas, C. Performance evaluation of the active-flow personal DataRAM PM2.5 mass monitor (Thermo Anderson pDR-1200) designed for continuous personal exposure measurements. *Atmospheric Environment* **2004**, *38*, 3329–3340.

[2] Wang, Y.; Li, J.; Jing, H.; Zhang, Q.; Jiang, J.; Biswas, P. Laboratory Evaluation and Calibration of Three Low-Cost Particle Sensors for Particulate Matter Measurement. *Aerosol Science and Technology* **2015**, *49*, 1063–1077
